# Supplementary material
Source: publisher figshare collection journal article supplement (https://acs.figshare.com/ndownloader/files/4045321)
Supplement: Supplementary file 1 [file 4045321]

## Supplementary Information

### Factors that Affect Pickering Emulsions stabilized by Graphene Oxide

*Yongqiang He<sup>1,2</sup> Fei Wu<sup>2\*</sup> Xiyang Sun<sup>2</sup> Ruqiang Li<sup>2</sup> Yongqin Guo<sup>2</sup>*

*Chuanbao Li<sup>2</sup> Lu Zhang<sup>2</sup> Fubao Xing<sup>2</sup> Wei Wang<sup>3</sup> Jianping Gao<sup>2\*</sup>*

(<sup>1</sup> Department of Applied Chemistry, Yuncheng University, Yuncheng 044000,

<sup>2</sup>School of Science, <sup>3</sup>School of Chemical Engineering, Tianjin University, Tianjin  
300072, P R China)

Fax: +86 22 274 034 75; Tel: 022-27403475; E-mail: [Wufei0125@yahoo.cn](mailto:Wufei0125@yahoo.cn), [jianpingg@eyou.com](mailto:jianpingg@eyou.com)

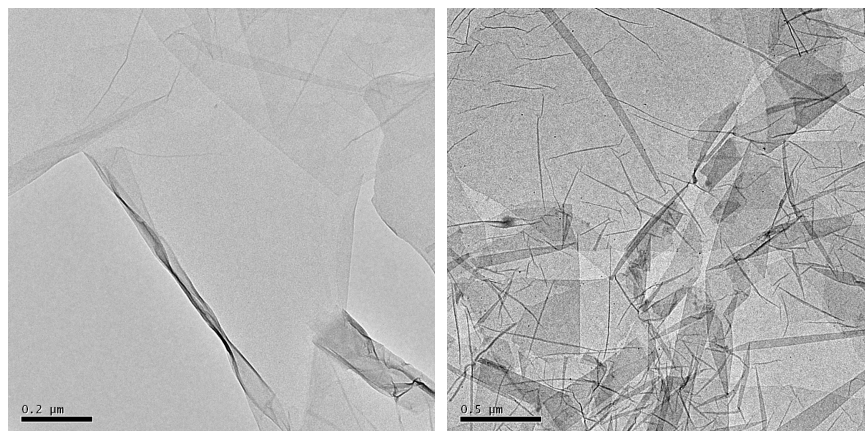

**Figure S1.** The TEM images of GO sheets.

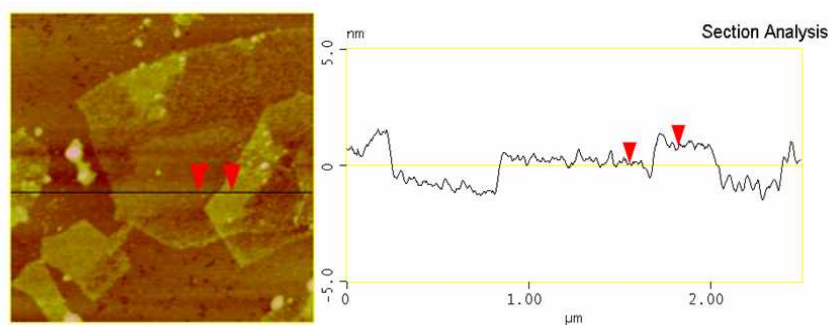

**Figure S2.** AFM tap-mode image and height profile of GO.

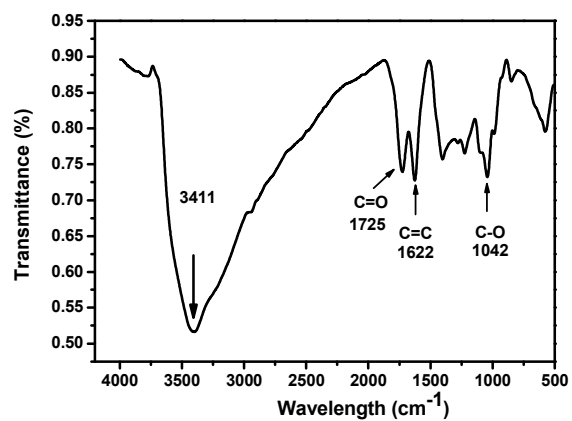

Figure S3. FT-IR spectrum of GO.

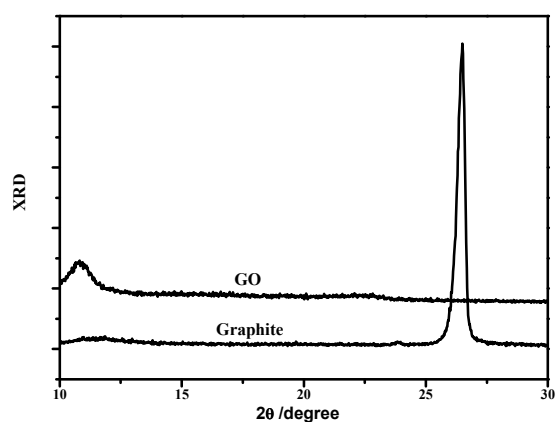

Figure S4. XRD patterns of graphite and GO.

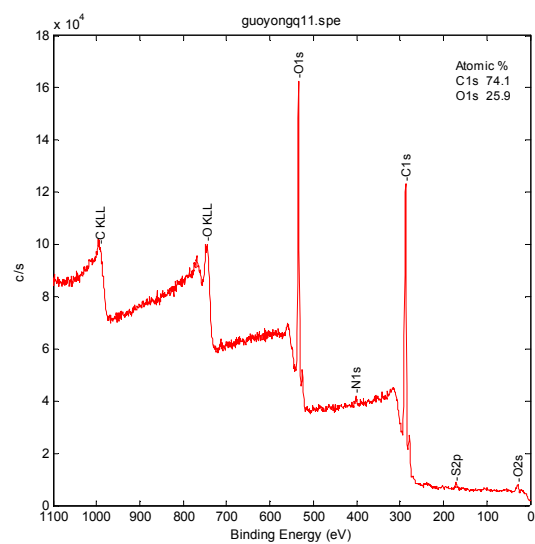

(A)

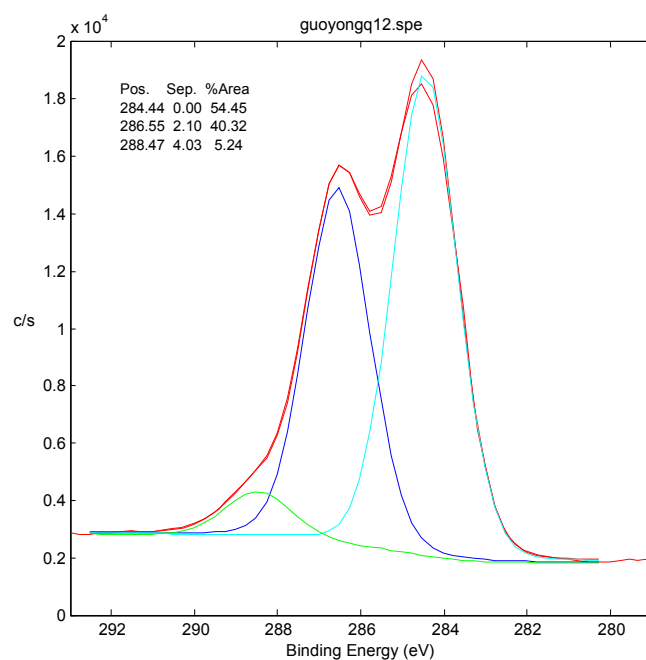

(B)

**Figure S5.** (A) The XPS spectra for GO. (B) The C1s XPS spectra for GO.

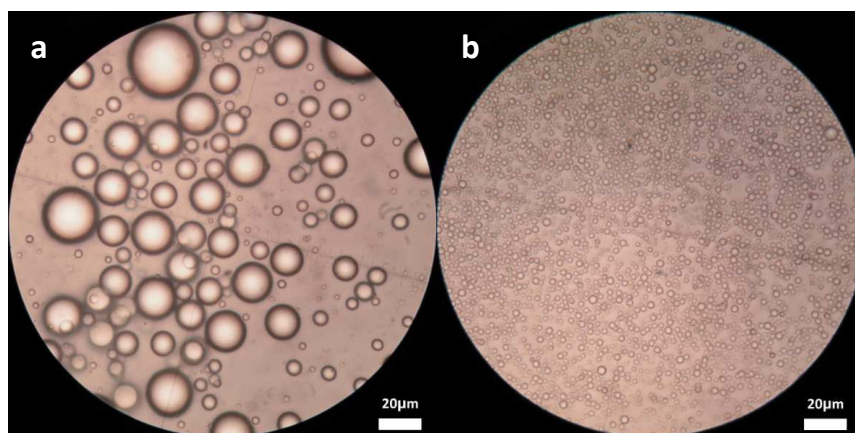

**Figure S6.** Optical micrographs 72 h after preparation of Pickering emulsions stabilized by GO using (a) benzene and (b) benzene with dissolved naphthalene as solvents.

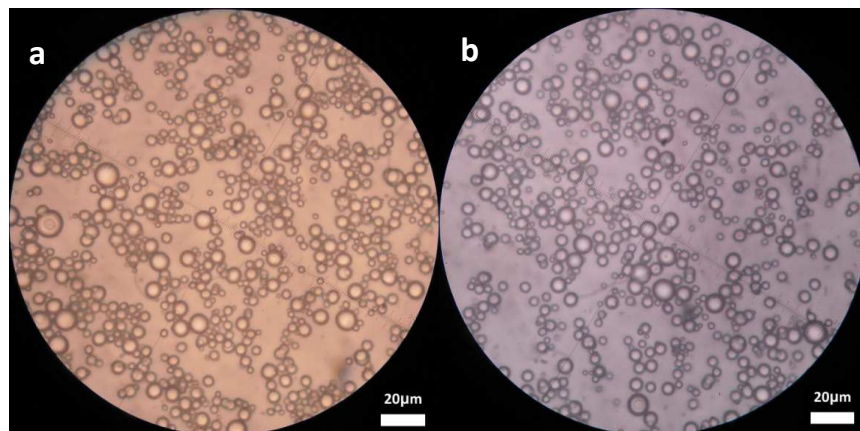

**Figure S7.** Optical micrographs and photographs 72 h after preparation of benzyl chloride-in-water Pickering emulsions stabilized by GO with (a) 7 min and (b) 10 min of sonication.

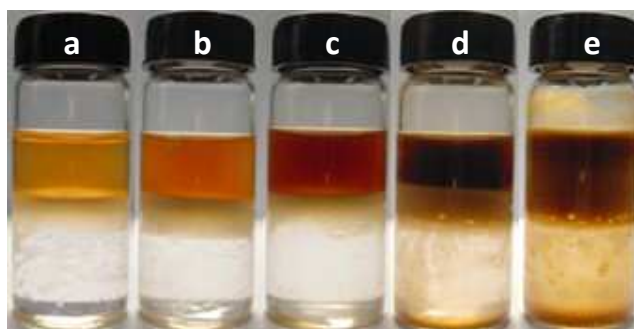

**Figure S8.** Photographs of Pickering O/W emulsions stabilized by GO at different concentrations: (a) 0.25 mg/mL, (b) 0.5 mg/mL, (c) 1 mg/mL, (d) 3 mg/mL, (e) 6 mg/mL. The oil/ water ratio is 2:1.

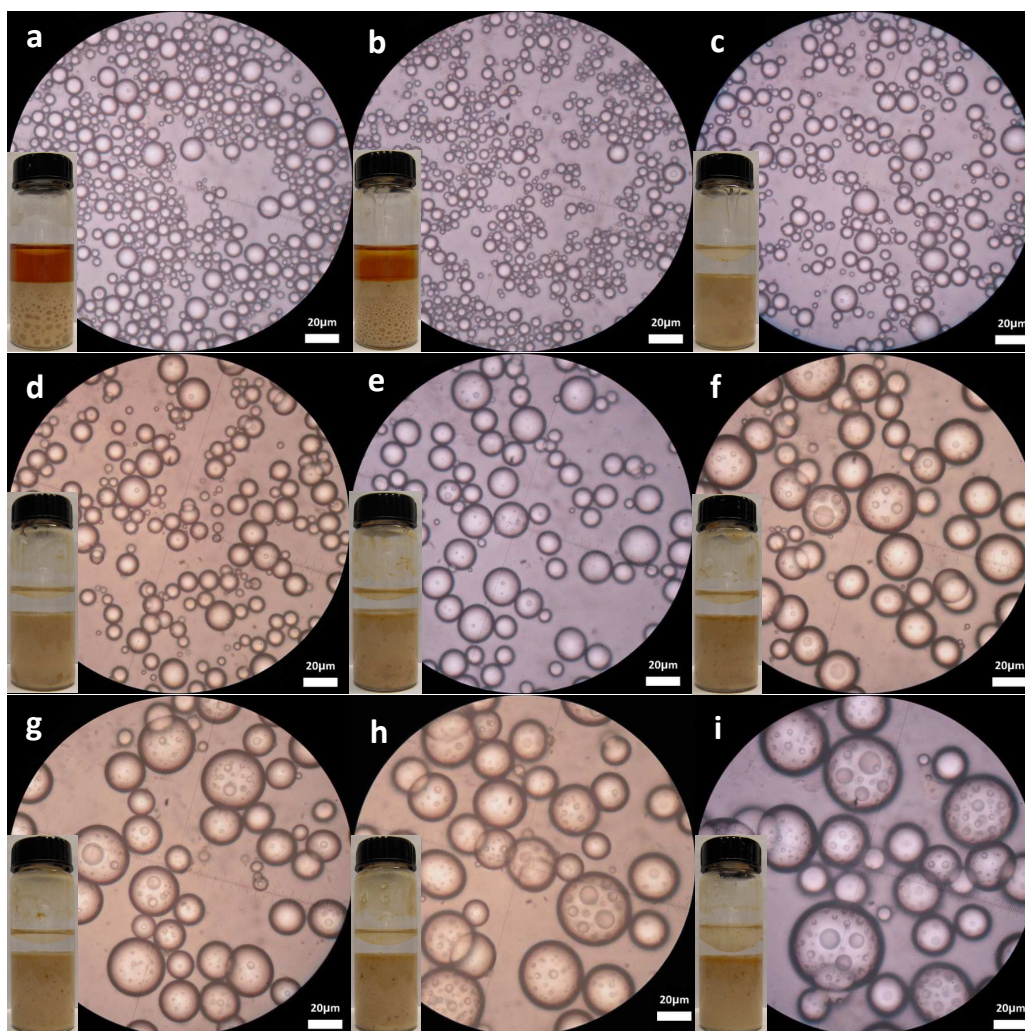

**Figure S9.** Optical micrographs and photographs 72 h after preparation of Pickering emulsions stabilized by GO with different  $\text{MgCl}_2$  concentrations. The concentrations of  $\text{MgCl}_2$  (mM) are (a) 0.1, (b) 1, (c) 10, (d) 20, (e) 50, (f) 100, (g) 300, (h) 500, and (i) 1000. GO concentration:  $1 \text{ mg mL}^{-1}$ , oil/water ratio: 1:1.
